# Supplementary material for: Molecular Changes in Opisthorchis viverrini (Southeast Asian Liver Fluke) during the Transition from the Juvenile to the Adult Stage
Source: PLoS Negl Trop Dis. 2012 Nov 29;6(11):e1916. doi: 10.1371/journal.pntd.0001916 (PMC3510066; doi:10.1371/journal.pntd.0001916)
Supplement: Table S4 — Comparative summary of the enriched transcription of conserved biological pathways in adult or juveniles of Opistorchis viverrini based on orthology to molecules in the Kyoto Encyclopaedia of Genes and Genomes (KEGG). (XLSX) [file pntd.0001916.s004.xlsx]

## Sheet: Table S4
Table S4 Comparative summary of the enriched transcription of conserved biological pathways in adult or juveniles of Opistorchis viverrini based on orthology to molecules in the Kyoto Encyclopaedia of Genes and Genomes (KEGG).
		Number of sequences (k-terms)
Pathway		Adult	Juvenile
Metabolism
ko01100	Metabolic pathways	58 (41)	138 (71)
ko00071	Fatty acid metabolism	2 (1)	16 (11)
ko00190	Oxidative phosphorylation	1 (1)	51 (17)
ko00230	Purine metabolism	10 (8)	6 (4)
ko00280	Valine, leucine and isoleucine degradation	1 (1)	22 (16)
ko00310	Lysine degradation	3 (2)	13 (10)
ko00640	Propanoate metabolism	4 (3)	16 (12)
ko00650	Butanoate metabolism	0 (0)	10 (8)
ko01110	Biosynthesis of secondary metabolites	26 (14)	28 (21)
ko01120	Microbial metabolism in diverse environments	9 (8)	26 (22)
Environmental Information Processing
ko04010	MAPK signaling pathway	13 (9)	11 (8)
ko04020	Calcium signaling pathway	11 (7)	22 (9)
ko04310	Wnt signaling pathway	9 (9)	13 (8)
Cellular Processes
ko04110	Cell cycle	8 (8)	3 (3)
ko04114	Oocyte meiosis	19 (12)	13 (3)
ko04142	Lysosome	13 (9)	189 (13)
ko04510	Focal adhesion	15 (10)	32 (15)
ko04530	Tight junction	1 (1)	23 (9)
ko04540	Gap junction	25 (8)	8 (4)
ko04810	Regulation of actin cytoskeleton	12 (6)	18 (8)
Genetic Information Processing
ko04141	Protein processing in endoplasmic reticulum	12 (8)	2 (2)
Organismal Systems
ko04360	Axon guidance	3 (3)	19 (8)
ko04724	Glutamatergic synapse	5 (5)	12 (9)
ko04725	Cholinergic synapse	6 (6)	12 (8)
ko04910	Insulin signaling pathway	22 (13)	21 (7)
ko04916	Melanogenesis	19 (9)	17 (7)
ko04971	Gastric acid secretion	10 (8)	15 (5)
Human Diseases
ko05010	Alzheimer's disease	8 (5)	52 (18)
ko05012	Parkinson's disease	1 (1)	54 (20)
ko05016	Huntington's disease	29 (8)	42 (16)
ko05146	Amoebiasis	2 (2)	16 (8)
ko05200	Pathways in cancer	14 (12)	16 (11)
